# Supplementary figures and images for: Spatiotemporal Protein Atlas of Cell Death-Related Molecules in the Rat MCAO Stroke Model
Source: PubMed Central journal article supplement — Exp Neurobiol. 2018 Aug 16;27(4):287–98. doi: 10.5607/en.2018.27.4.287 (PMC6120968; doi:10.5607/en.2018.27.4.287), 2018-08-16

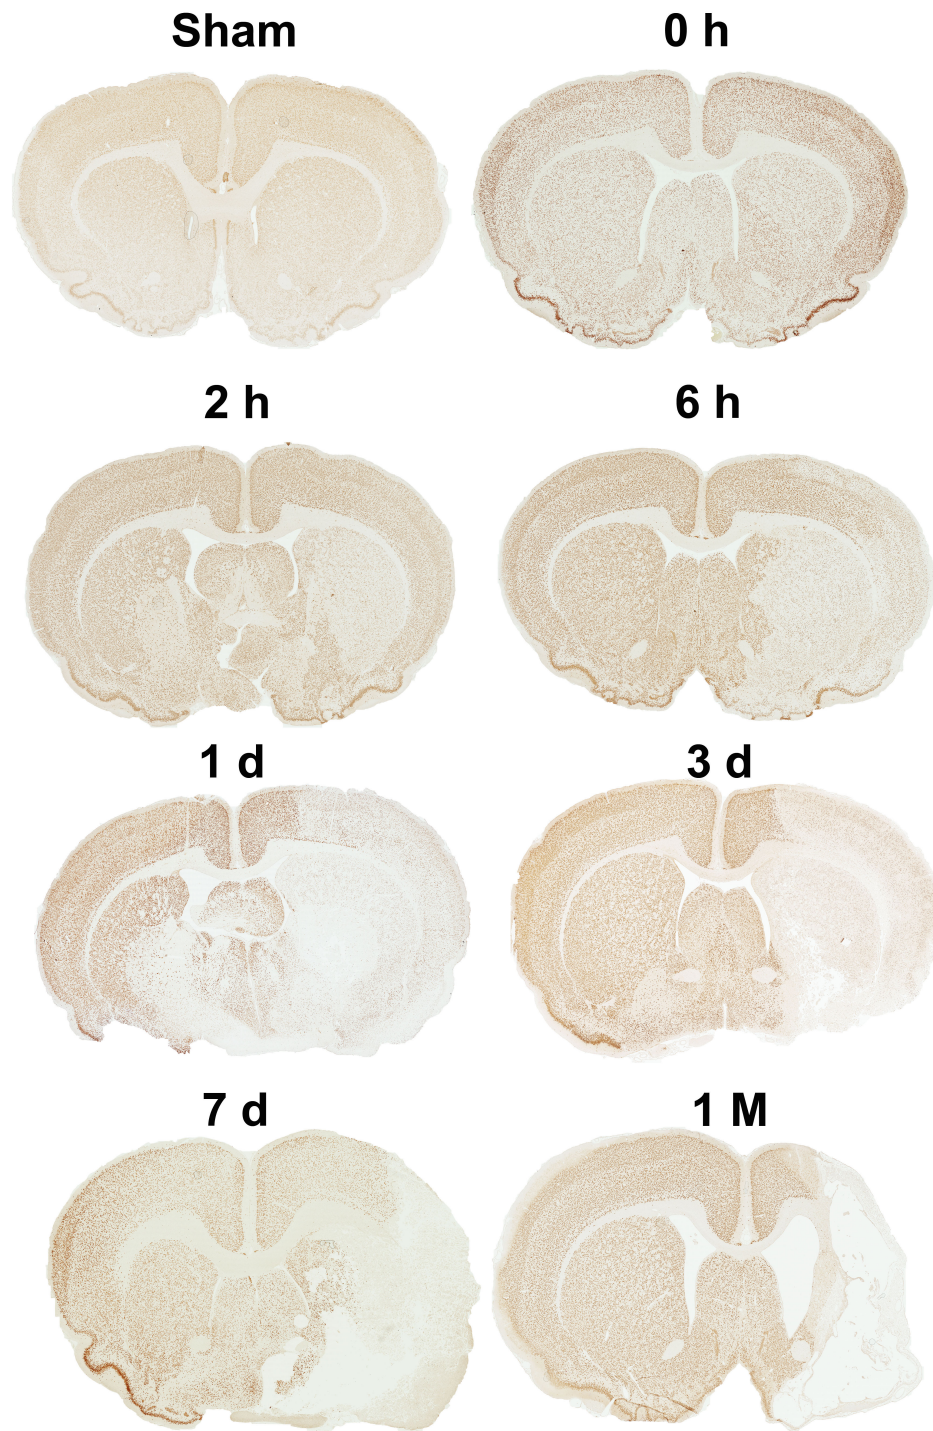

**Supplementary Fig. 3.** NeuN immunostaining of MCAO/R brain.

Supplement: en-27-287-s003.pdf [file en-27-287-s003.pdf]

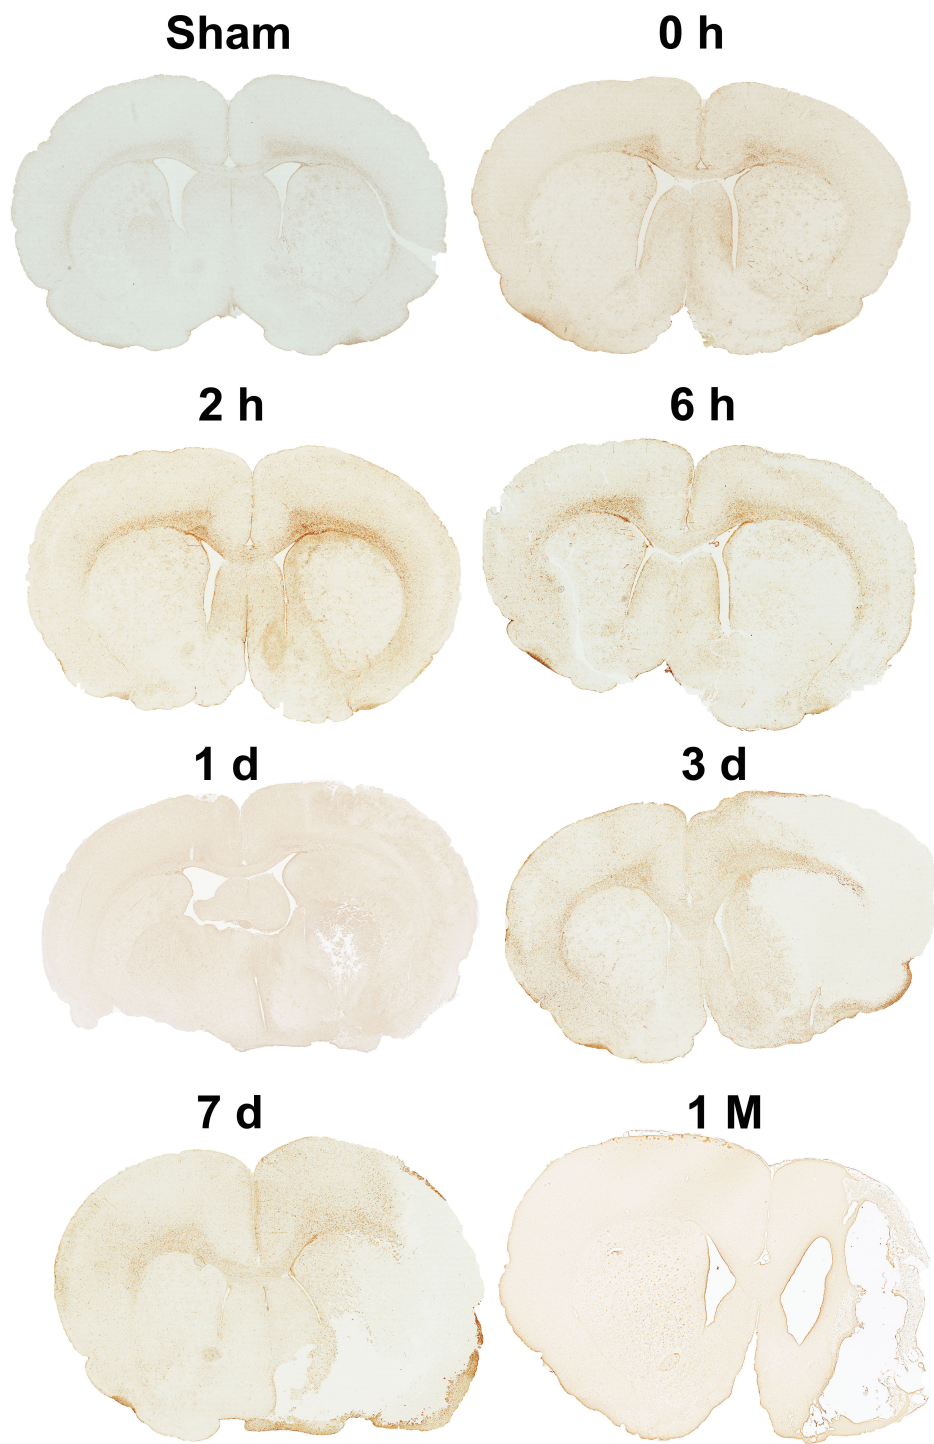

**Supplementary Fig. 4.** GFAP immunostaining of MCAO/R brain.

Supplement: en-27-287-s004.pdf [file en-27-287-s004.pdf]

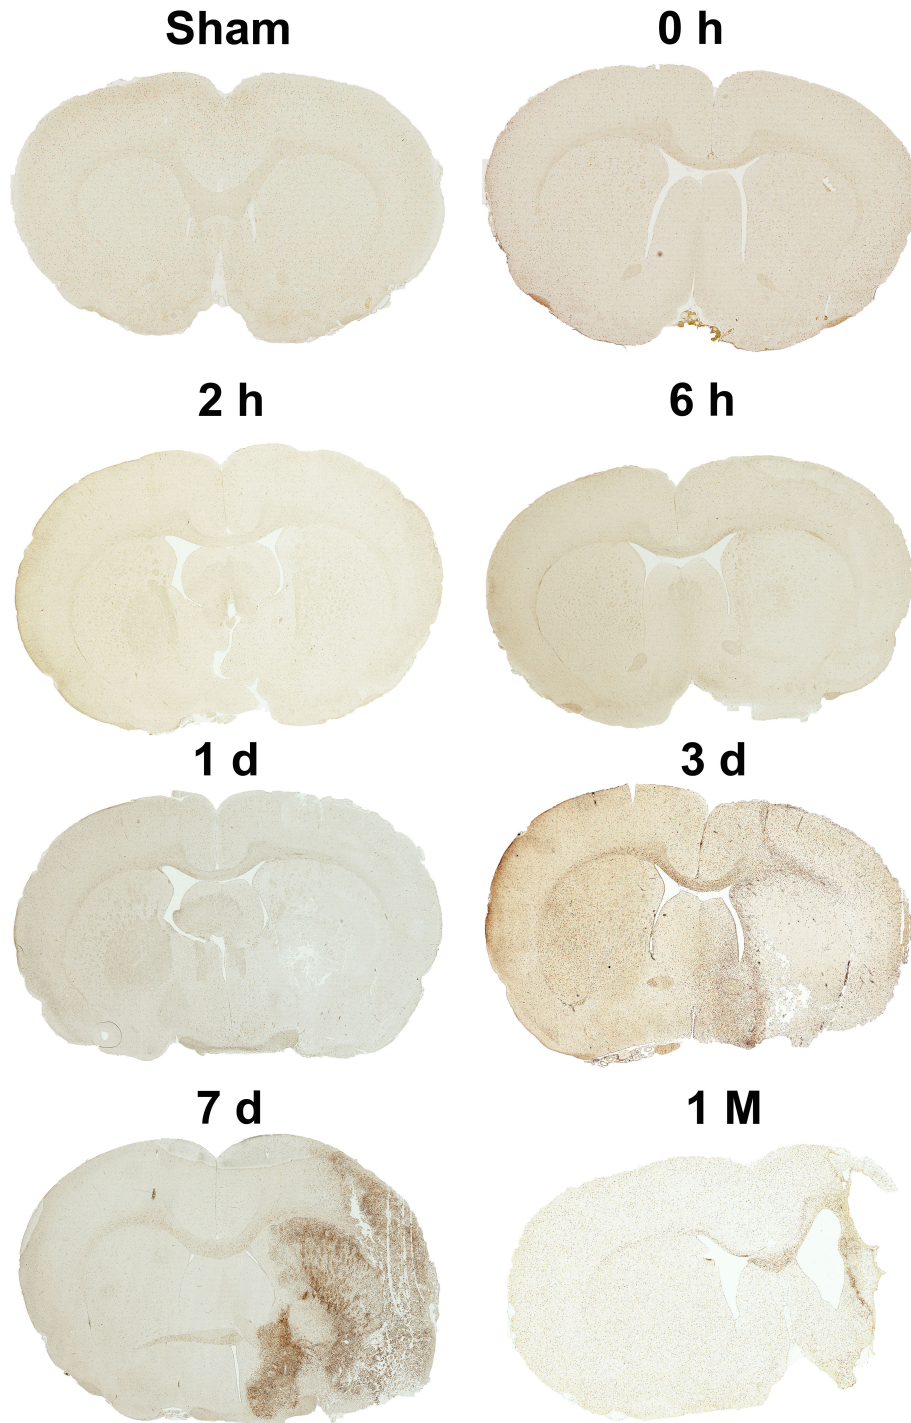

**Supplementary Fig. 5.** Iba1 immunostaining of MCAO/R brain.

Supplement: en-27-287-s005.pdf [file en-27-287-s005.pdf]

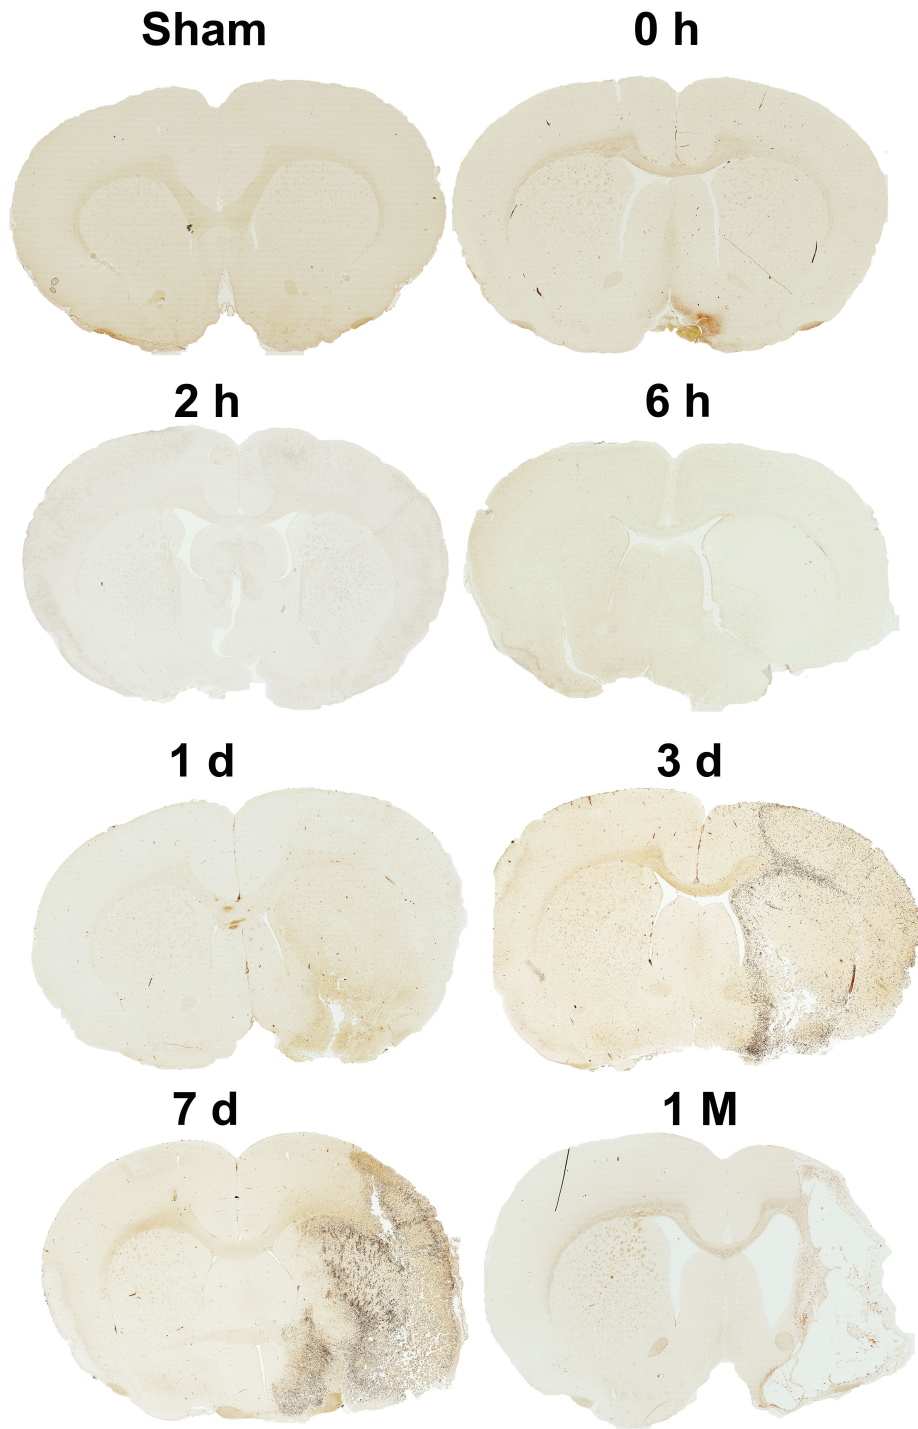

**Supplementary Fig. 6.** CD68 immunostaining of MCAO/R brain.

Supplement: en-27-287-s006.pdf [file en-27-287-s006.pdf]

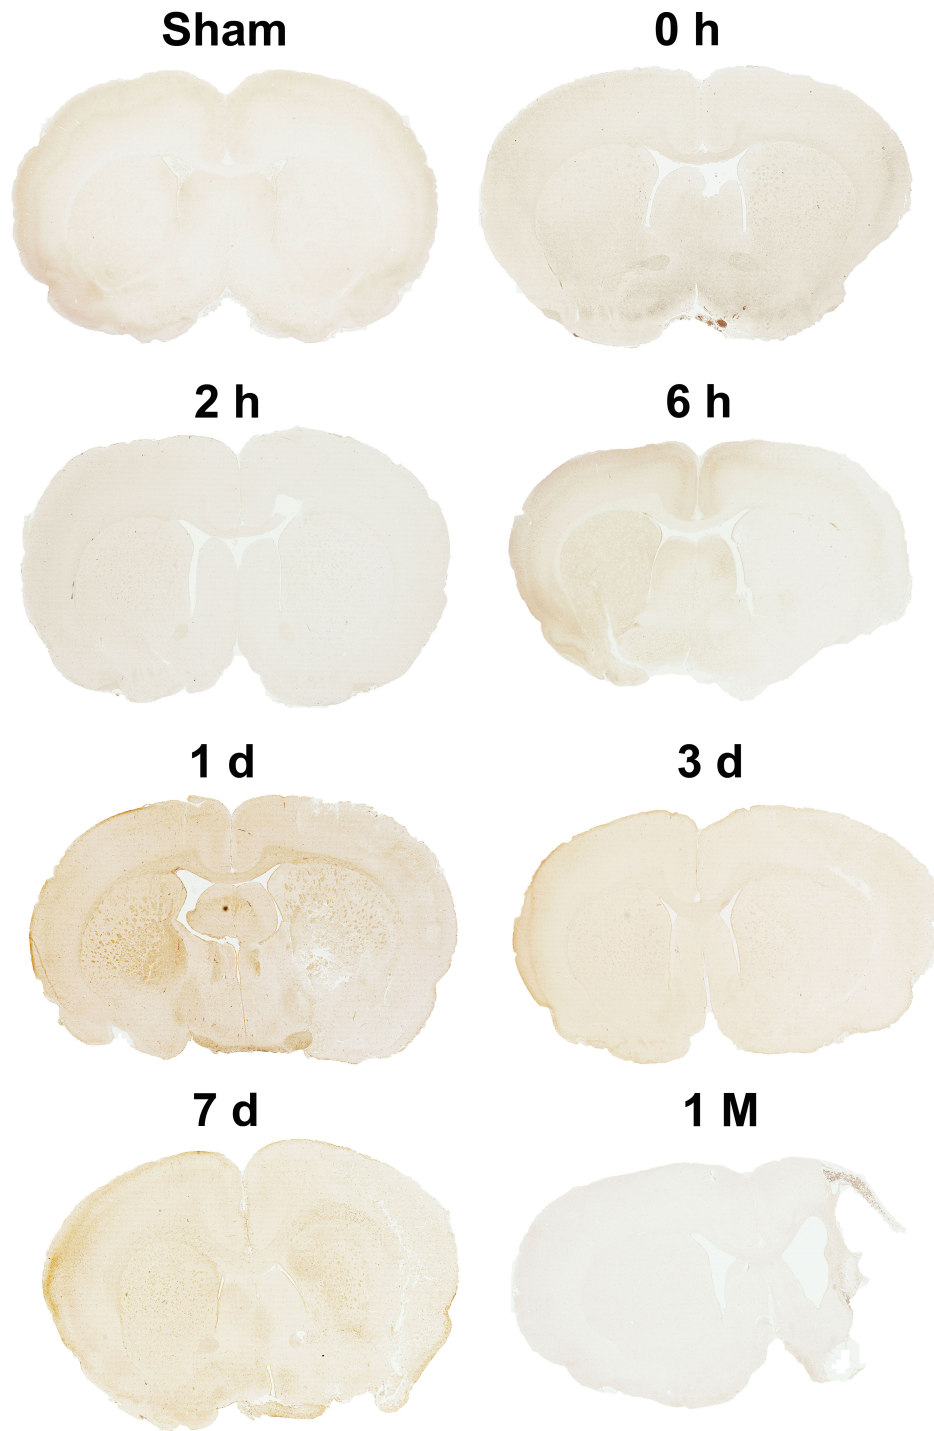

**Supplementary Fig. 7.** Cleaved caspase-3 immunostaining of MCAO/R brain.

Supplement: en-27-287-s007.pdf [file en-27-287-s007.pdf]

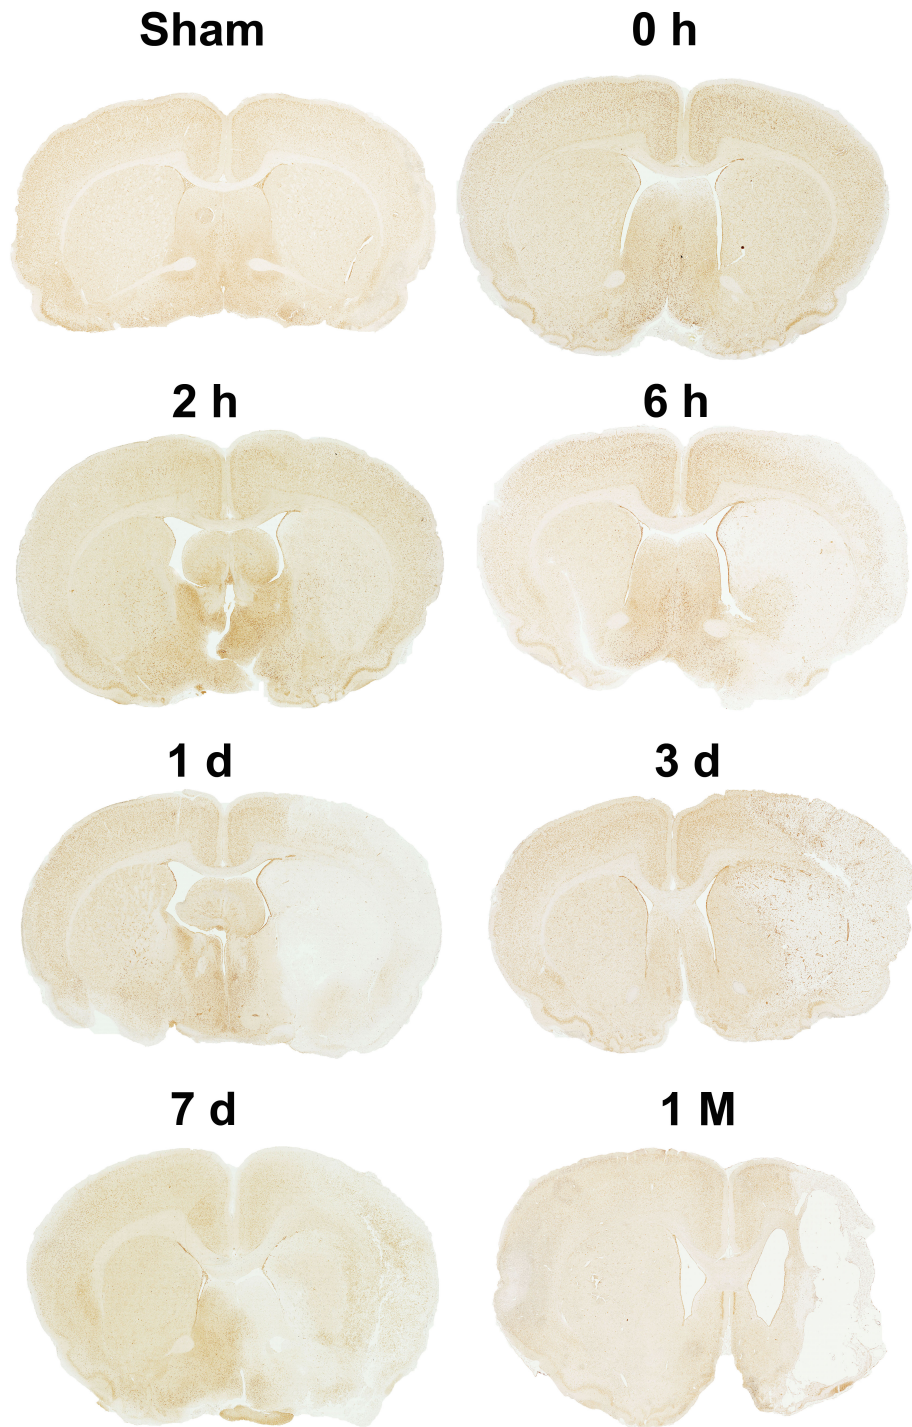

**Supplementary Fig. 10.** FAF1 immunostaining of MCAO/R brain.

Supplement: en-27-287-s010.pdf [file en-27-287-s010.pdf]
